# Supplementary material
Source: HighWire-hosted journal article supplement (https://bmjopen.bmj.com/content/8/2/e018557)
Supplement: inline-supplementary-material-3 [file inline-supplementary-material-3.pdf]

Table 1: Study Characteristics

| Study            | Country     | Study length (days) | N (men%)   | Population                                                              | Test                                                                                               |
|------------------|-------------|---------------------|------------|-------------------------------------------------------------------------|----------------------------------------------------------------------------------------------------|
| <b>Under-use</b> |             |                     |            |                                                                         |                                                                                                    |
| Ahmad 2012       | Indonesia   | 181                 | 554 (41%)  | Patients registered at health clinics where TB was suspected            | Sputum smear microscopy                                                                            |
| Belletti 2013    | USA         | N/S                 | 1517 (46%) | Patients with COPD                                                      | Pulmonary function tests (PFT)                                                                     |
| Bertella 2013    | Italy       | 1765                | 437 (286)  | Patients with COPD                                                      | PFTs                                                                                               |
| Caplan 2000      | USA         | 365                 | 81         | Patients with a thyroid nodule                                          | FNA of thyroid                                                                                     |
| Chavez 2009      | USA         | 2920                | 200 (48%)  | Patients with COPD                                                      | PFT                                                                                                |
| Droogendijk 2011 | Netherlands | 730                 | 287 (45%)  | Women >50yrs and men >18 years with Iron Deficiency Anaemia             | Upper endoscopy and colonoscopy                                                                    |
| Gerrits 2008     | Netherlands | 2556                | 65 (0%)    | Women aged 18 – 65 yrs with newly diagnosed urinary incontinence        | Urine dipstick                                                                                     |
| Gibbons 2010     | New Zealand | 364                 | 265        | Patients with subclinical hypothyroidism                                | Free T4                                                                                            |
| Gnani 2004       | UK          | 365                 | 90 (53%)   | Patients with heart failure                                             | CXR, ECG and Echocardiogram                                                                        |
| Girard 2010      | France      | 28                  | 19 (37%)   | Patients with acute hepatitis                                           | Hepatitis serology (HBs antigens, anti-HBc antibodies)                                             |
| Kinuoani 2017    | France      | 150                 | 61 (18%)   | Patients with urinary tract infections                                  | Urine Dipstick                                                                                     |
| Lange 2007       | Denmark     | 91                  | 2549 (44%) | Patients with COPD                                                      | PFTs                                                                                               |
| Lipczynska 2012  | Poland      | 61                  | 93         | Aged ≥ 55 with Heart Failure (HF) or HF risk factors                    | Echocardiogram, BNP, CXR                                                                           |
| Loo 2009         | UK          | 364                 | 131 (50%)  | Patients with Atrial Fibrillation                                       | Echocardiogram                                                                                     |
| Majumdar 2003a   | USA         | 2371                | 531 (47%)  | Patients >50 years, on Proton Pump Inhibitors with persistent dyspepsia | Upper endoscopy                                                                                    |
| Majumdar 2003b   | USA         | 2371                | 132 (47%)  | Patients with peptic ulcer disease (PUD)                                | H.pylori                                                                                           |
| Moscavitch 2009  | Brazil      | 61                  | 167 (43%)  | Patients with Heart Failure                                             | ECG, CXR, Echocardiogram                                                                           |
| Musicco 2004     | Italy       | NR                  | 1549 (38%) | Patients being assessed for Dementia                                    | Collection of laboratory tests to rule out conditions with similar presenting symptoms to dementia |

|                              |              |      |             |                                                            |                                                                          |
|------------------------------|--------------|------|-------------|------------------------------------------------------------|--------------------------------------------------------------------------|
| Nicholson 2010               | UK           | 1827 | 6943 (100%) | Men with epididymo-orchitis                                | C. trachomatis, N. gonorrhoeae, urethral swabs and midstream urinalysis. |
| Nicopoulos 2003              | UK           | 242  | 32          | Patients with subfertility                                 | Mid-luteal progesterone and semen analysis                               |
| Pimlott 2006                 | Canada       | 1611 | 160 (34%)   | Patients with Dementia                                     | FBC, TSH, serum electrolytes, serum calcium, glucose                     |
| Smith 2008                   | UK           | 731  | 29870 (52%) | Patients with COPD                                         | PFT                                                                      |
| Sokol 2015                   | USA          | 3652 | 75902 (23%) | Patients with Asthma                                       | PFT                                                                      |
| Ulrik 2010                   | Denmark      | 121  | 1716 (44%)  | Patients with COPD                                         | PFT                                                                      |
| Ulrik 2013                   | Denmark      | 731  | 4058        | Patients with COPD                                         | PFT                                                                      |
| van der Pluijm-Schouten 2017 | Netherlands  | 840  | 100%*       | Patients (couples) referred to IVF clinics                 | Chlamydia Antibody Titre and Semen Analysis                              |
| <b><u>Over-use</u></b>       |              |      |             |                                                            |                                                                          |
| Aljebreen 2013               | Saudi Arabia | 365  | 147 (51%)   | Patients who had upper endoscopy                           | Upper endoscopy                                                          |
| Azzam 2015                   | Saudi Arabia | 121  | 161 (30%)   | Dyspeptic patients who had upper endoscopy                 | Upper endoscopy                                                          |
| Bhatt 2001                   | UK           | 504  | 437 (65%)   | Patients referred for pelvis x-rays                        | Pelvis x-ray                                                             |
| Birk-Urovitz 2017            | Canada       | 1538 | 77 (38%)    | Patients that had a Thyroid Stimulating Hormone (TSH) test | TSH                                                                      |
| Bishop 2003                  | Canada       | 28   | 139         | Patients with non-red flag LBP                             | Advanced imaging (CT, MRI or bone scan)                                  |
| Cai 2015                     | USA          | 121  | 550 (46%)   | Patients who under went upper endoscopy                    | Upper endoscopy                                                          |
| Chan 2004                    | Malaysia     | 153  | 250 (45%)   | Patients who under went upper endoscopy                    | Upper endoscopy                                                          |
| Chan 2006                    | Malaysia     | 184  | 27 (63%)    | Patients who underwent 'diagnostic colonoscopies'          | Colonoscopy                                                              |
| Cardin 2005                  | Italy        | 151  | 1678        | Patients who had upper endoscopy                           | Upper endoscopy                                                          |
| Cardin 2007                  | Italy        | 182  | NR          | Dyspeptic patients who had upper endoscopy                 | Upper endoscopy                                                          |
| Eccles 2001                  | UK           | 182  | 275         | Patients who had knee or lumbar x-ray                      | Lumbar or knee x-ray                                                     |
| Elwyn 2007                   | UK           | 184  | 215         | Patients who under went upper endoscopy                    | Upper endoscopy                                                          |
| Fiorenza 2017                | USA          | 456  | 45 (34%)    | Patients who under went upper endoscopy                    | Upper Endoscopy                                                          |

|                       |           |      |            |                                                                             |                                                              |
|-----------------------|-----------|------|------------|-----------------------------------------------------------------------------|--------------------------------------------------------------|
| Grover 2007           | USA       | 364  | 68 (0%)    | Patients with uncomplicated UTI                                             | Urine culture and sensitivity analysis                       |
| Gurzun 2014           | UK        | 7    | 1070 (54%) | Patients who underwent an echocardiogram                                    | Echocardiogram                                               |
| Hassan 2007           | Italy     | 30   | 3769 (46%) | Patients who underwent upper endoscopy                                      | Upper endoscopy                                              |
| Hughes-Anderson 2002a | Australia | 1613 | 154 (55%)  | Patients who had colonoscopy                                                | Colonoscopy                                                  |
| Hughes-Anderson 2002b | Australia | 1613 | 162 (55%)  | Patients who had upper endoscopy,                                           | Upper endoscopy                                              |
| Ip 2014               | USA       | 1096 | 100 (43%)  | Patients with non-red flag LBP                                              | MRI lumbar spine                                             |
| Johnson 2011          | USA       | 510  | 779 (0%)   | Patients with uncomplicated UTI                                             | Urine culture                                                |
| Kovacs 2013           | Spain     | 183  | 602 (48%)  | Patients with non-red flag LBP                                              | MRI lumbar spine                                             |
| Lalude 2014           | USA       | 121  | 102        | Patients who had SPECT Myocardial perfusion imaging (MPI) studies           | Single Photon Emission CT (SPECT) MPI                        |
| Landry 2011           | USA       | 272  | 124        | Patients who had U/S of thyroid, pelvis, abdo, carotid or soft tissue       | Thyroid, pelvis, abdomen, carotid or soft tissue ultrasound  |
| Lin 2016              | Australia | NR   | NR         | Patients with non-red flag LBP                                              | Lumbar Spine X-ray                                           |
| Lindbäck 2017         | Sweden    | 59   | 0          | Patients that had urinary cultures                                          | Urinary Culture                                              |
| Linder 2006           | USA       | 608  | 1076 (19%) | Patients with pharyngitis                                                   | Strep testing (rapid antigen detection test, throat culture) |
| Llor 2011             | Spain     | 122  | 658 (0%)   | Women with UTI                                                              | Urine cultures                                               |
| Mafi 2013             | USA       | 4377 | 8066       | Patients with non-red flag LBP                                              | X-ray, CT or MRI                                             |
| Mafi 2015             | USA       | 4018 | 9362 (25%) | Patients with uncomplicated headache (non-red flag                          | CT and MRI                                                   |
| Michaleff 2012        | Australia | 3621 | 3070 (70%) | Patients reporting first time neck pain or LBP (non-specific, non red flag) | Any radiological test                                        |
| Noya 2008             | Israel    | N/S  | 209 (35%)  | Patients who had H.pylori testing                                           | H. pylori test                                               |
| Piccoliori 2013       | Italy     | 63   | 475 (43%)  | Acute or chronic non-red flag LBP                                           | Any radiological test                                        |
| Piterman 2008         | Australia | 550  | 19219      | Patients with GORD                                                          | Endoscopy. Barium Swallow                                    |
| Remedios 2014         | UK        | NR   | 2026       | Patients who had CTs and/or MRIs                                            | CT and/or MRI                                                |
| Sharp 2015            | USA       | 730  | 37,464     | Patient with Acute Sinusitis                                                | CT Sinuses                                                   |

|               |             |      |            |                                 |                    |
|---------------|-------------|------|------------|---------------------------------|--------------------|
| Schers 2000   | Netherlands | 214  | 1096 (50%) | Patients with non-red flag LBP  | X-ray              |
| Tahvonen 2017 | Finland     | 180  | 18 (35%)   | Patients with non-red flag LBP  | Lumbar Spine X-ray |
| Van Gurp 2013 | Netherlands | 366  | 155 (38%)  | Patients who had Echocardiogram | Echocardiogram     |
| Williams 2010 | Australia   | 1005 | 1706 (43%) | Patients with non-red flag LBP  | All imaging        |

\*Both men and women
